# Supplementary material for: A DNA–scaffolded silver nanocluster/Cu2+ ensemble as a turn-on fluorescent probe for histidine
Source: Royal Society of Chemistry journal article supplement (doi:10.1039/c4an00487f), 2014-01-01
Supplement: c4an00487f1.pdf [file c4an00487f1.pdf]

## SUPPLEMENTARY INFORMATION

# A DNA-scaffolded silver nanocluster/ $\text{Cu}^{2+}$ ensemble as a turn-on fluorescent probe for histidine

*Ying Zhou,<sup>a</sup> Tianshu Zhou,<sup>b</sup> Min Zhang,<sup>\*a</sup> and Guoyue Shi<sup>\*a</sup>*

<sup>1</sup> Department of Chemistry, 500 Dongchuan Road, East China Normal University, Shanghai, 200241, P.R.China; <sup>2</sup> Department of environmental Science, 500 Dongchuan Road, East China Normal University, Shanghai, 200241, P.R.China

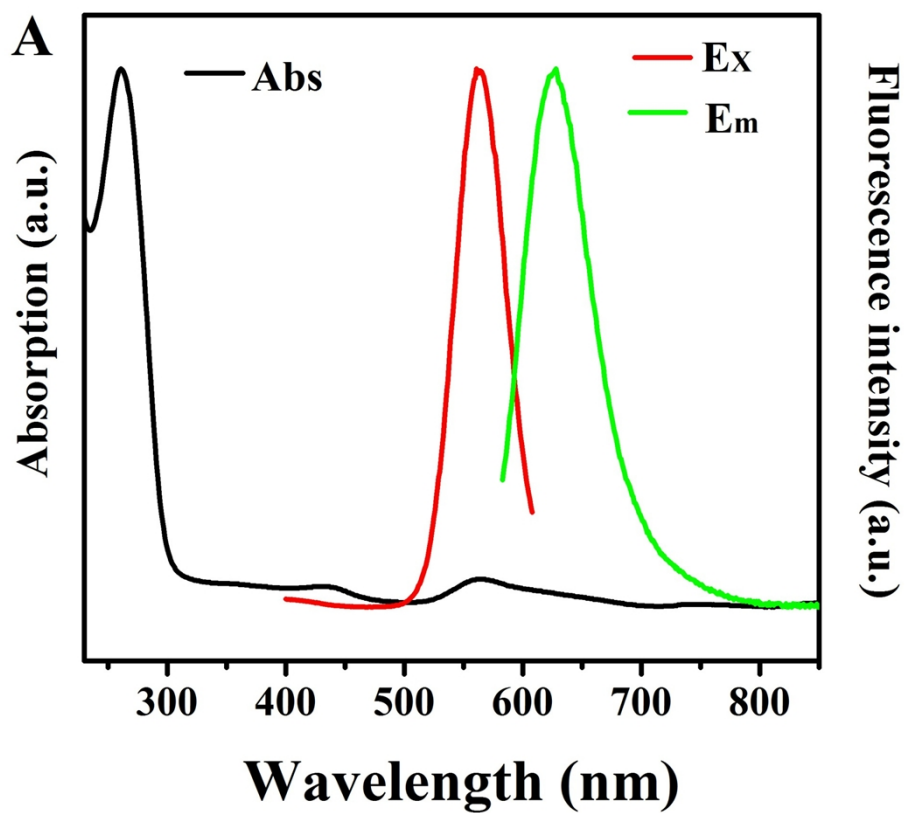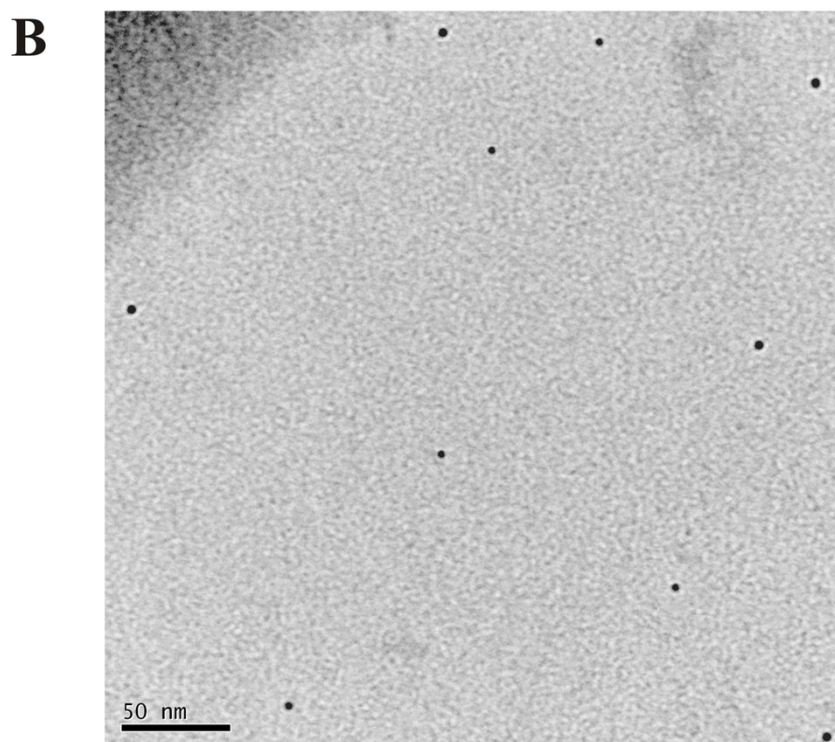

**Fig. S1** (A) The absorption, maximum excitation and emission spectra of the highly fluorescent DNA-AgNCs; (B) A typical TEM image of the DNA-AgNCs.

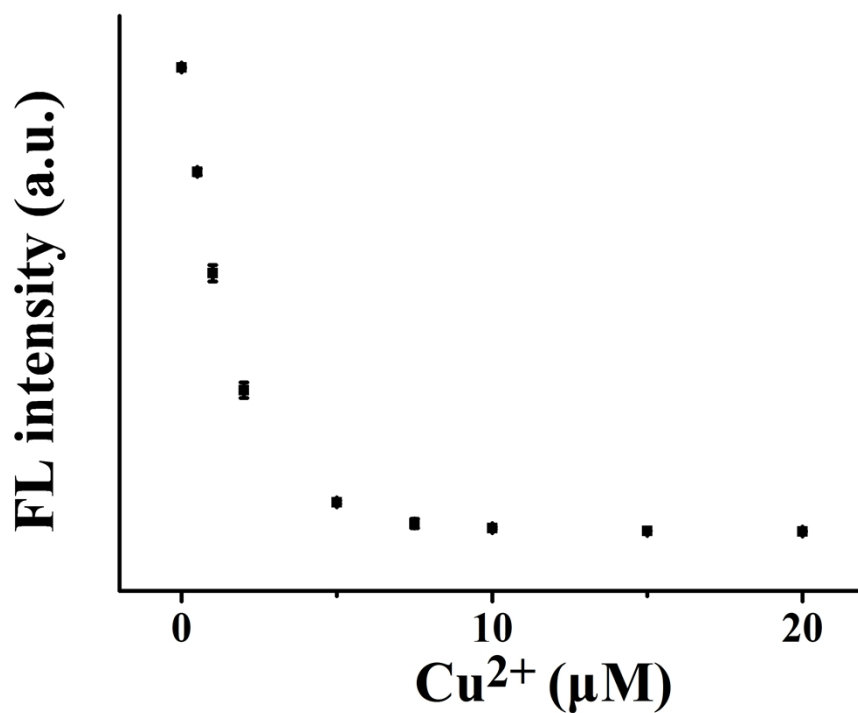

**Fig. S2** Fluorescence response of DNA-AgNCs to different concentrations of Cu<sup>2+</sup>.

**Table S1** Determination of histidine in artificial urine samples and recovery test by the proposed method (n=3).

|                         | Spiked (μM) | Measured <sup>a</sup> (μM) | Recovery (%) <sup>a</sup> |
|-------------------------|-------------|----------------------------|---------------------------|
| Spiked artificial urine | 0.00        | Nd <sup>b</sup>            |                           |
|                         | 12.00       | 14.79±0.26                 | 98.6±1.7                  |
|                         | 18.00       | 18.07±0.26                 | 100.4±1.5                 |

<sup>a</sup> mean ± std, n=3. <sup>b</sup> not detected.
